1 **Determining the indirect costs of suicide in Sweden between 2010 and 2019 - A cost of**  
2 **illness study**

3  
4

5 Daniela Wikström<sup>1</sup>; Camilla Nystrand, PhD<sup>1,2</sup>; Gergö Hadlaczky, PhD<sup>1,2</sup>. Filip Gedin\*, PhD<sup>3</sup>.

6

7 1. Department of Learning, Informatics, Management and Ethics, Karolinska Institutet,  
8 Stockholm, Sweden

9 2. Center for Health-economy, informatics and health care research, Stockholm  
10 Healthcare Services, Stockholm, Sweden

11 3. Department of Clinical Neuroscience, Karolinska Institutet, Stockholm, Sweden

12 \*Corresponding author

13 **Keywords:** Cost of illness, suicide, suicide prevention, public health

14

15 **Correspondence to:**

16 Filip.gedin@ki.se

17 Nobels väg 9, D3

18 17176 Stockholm

19 Sweden

20 Filip.gedin@ki.se

21

22

23

24

25

26

27

28

29

30

31

32

33

**NOTE: This preprint reports new research that has not been certified by peer review and should not be used to guide clinical practice.**

34 **Abstract**

35 **Background:** Globally, more than 700 thousand people commit suicide annually. In Sweden, the yearly  
36 incidence is between 1000 and 1500 people, which is higher than the global average. Understanding the  
37 economic burden of suicide could help highlight the importance and urgency of finding more effective  
38 treatments and preventative measures to help people suffering from suicidal thoughts and support studies  
39 evaluating the cost-effectiveness of various interventions.

40  
41 **Method:** This national population-based cross-sectional study estimated the indirect costs associated  
42 with all suicides in Sweden between 2010 and 2019. Indirect costs were estimated using the human  
43 capital approach. Data regarding average salaries and employment rates were extracted from publicly  
44 available data in Sweden. Productivity loss was estimated over two time horizons, the year following  
45 the suicide and over a lifetime horizon. Estimations were performed in total numbers for the yearly  
46 cohorts as well as per person.

47  
48 **Results:** Between 2010 and 2019, 1 406 to 1 591 suicides occurred every year in Sweden. In total,  
49 approximately 26 500 productive life years are lost every year due to suicide. In 2019, the productivity  
50 loss due to all suicides in Sweden was estimated to be 44 million euros over a one-year time horizon,  
51 where 10 million euros are direct losses in local and regional authority taxes. Over a lifetime,  
52 productivity losses amounted to 935 million euros. The corresponding estimations per person were 37  
53 and 778 thousand euros respectively over a one-year and a lifetime time horizon. Over a one-year time  
54 horizon, the productivity loss was highest in the older age groups.

55  
56 **Conclusions:** This study provides valuable insights into the economic burden of suicide on Swedish  
57 society. It underlines the potential economic benefits of effective suicide prevention, aligning with  
58 previous research highlighting the substantial returns—both monetary and in terms of human well-  
59 being—that successful prevention strategies can yield.

60  
61 **Keywords:** Cost of illness, suicide, suicide prevention, public health

## 62 **Introduction**

63 More than 700,000 people commit suicide across the world annually (1), and between 1,000 and 1,500  
64 people commit suicide per year in Sweden (2). The incidence of suicide is greater in Sweden than in the  
65 rest of the globe, with 10.7 deaths compared to 9 deaths per 100,000 people on average (3). People aged  
66 above 65 are more likely to commit suicide, followed by people aged between 45 and 64 years (2).  
67 Among adults, men are 2.5 times more likely to commit suicide than women are, and in the 15- to 29-  
68 year-old group, suicide is one of the leading causes of death (1). Suicide is classified as a major public  
69 health problem, not only because a person dies prematurely but also because of its extensive implications  
70 for family members, relatives, friends, and society at large. Although it is well known that mental health  
71 issues such as psychotic disorders and mood and anxiety disorders are associated with an increased risk  
72 for suicide, a recent meta-analysis estimated that the population attributable risk of mental disorders as  
73 a whole was approximately 21% (4). This substantial proportion should not be downplayed, but it is  
74 perhaps not surprising that most working-age individuals who die by suicide have no underlying mental  
75 health disorder and have an occupation at the time of their death (5).

76  
77 Previous research has shown that a large part of the costs attributed to suicide do not stem from direct  
78 medical costs but rather from costs associated with the loss of labor production (6, 7). However, these  
79 cost estimations are not based on complete national registries, introducing uncertainty in the estimations.  
80 While Sweden has some of the world's most comprehensive individual-level registries, it allows for  
81 encompassing estimations of the burden of suicide.

82  
83 Understanding the economic burden of suicide could help highlight the importance and urgency of  
84 finding more effective treatments and preventative measures to help people suffering from suicidal  
85 thoughts and support studies evaluating the cost-effectiveness of various interventions. In addition, how  
86 the economic burden is spread across different actors in society is important to policy makers and for  
87 budget allocation because it provides arguments for the potential economic benefit for different actors  
88 to invest in preventive measures. The aim of this study is to estimate the economic burden related to  
89 indirect costs that suicide has imposed on Swedish society between 2010 and 2019.

## 90 **Methods**

91 This national population-based cross-sectional study estimated the indirect costs associated with all  
92 suicides in Sweden between 2010 and 2019. Indirect costs were estimated using the human capital  
93 approach. This study was conducted in accordance with the STROBE reporting guidelines (see  
94 Supplementary Table 1). All data used in the study have been aggregated, publicly available data. Hence  
95 no ethical approval or consent has been necessary.

96

### 97 ***Data collection***

98 Data regarding the number of suicides committed in Sweden per year were acquired from the Swedish  
99 National Cause of Death Registry, which is held by the Swedish National Board of Health and Welfare.  
100 The data were accessed for research purposes from 2010 to 2019. Authors did not have access to  
101 information that could identify individual participants during or after data collection. To approximate  
102 the true incidence of suicides in Sweden, suicide deaths classified as ICDs X60-X84/E950-E959 were  
103 combined with so-called uncertain suicides, i.e., ICD Y10-Y34/E980-E989, between 2010 and 2019.  
104 The data were divided into yearly cohorts based on the year when the suicide occurred. Each yearly  
105 cohort was further subgrouped based on sex and age.

106

107 The parameters included in the calculations for productivity loss are outlined in Table 1. These included  
108 the average salary in Sweden retrieved from Statistics Sweden and data on average employment, social  
109 fees, the pension rate and vacation compensation. Furthermore, Table 1 displays the division of income  
110 taxes paid to the regional and local authorities.

111

112 *Table 1. Parameters included in the calculations.*

| <b>Parameter</b>                       | <b>Estimation</b> | <b>Sources</b> |
|----------------------------------------|-------------------|----------------|
| Average monthly salary in Sweden 2019  | 3 100 €           | (8)            |
| Average employment rate in Sweden 2019 | 67,3%             | (9)            |
| Social fees                            | 31,42%            | (10)           |
| Pension fee                            | 4,5%              | (11)           |
| Vacation compensation                  | 12%               | (12)           |

|                              |                              |                  |      |
|------------------------------|------------------------------|------------------|------|
| Taxes on salary compensation | Local level authority tax    | 20,70%           | (13) |
|                              | Regional level authority tax | 11,49%           | (13) |
|                              | Funeral fee                  | 0,23%            | (13) |
| Conversion from SEK to Euros |                              | 1 SEK = 0,087 €* | (14) |

113 \*Exchange rate on the 26<sup>th</sup> of November 2023  
114

## 115 *Cost analysis*

### 116 *Productivity loss*

117 The human capital approach was used to estimate the productivity loss that occurs due to premature  
118 death following completed suicide. Years of productive life lost were estimated by subtracting the age  
119 when the suicide occurred from the retirement age in Sweden and including the average mortality rate  
120 for each age (probability of surviving another year).  
121

122 Productivity loss was calculated over two different time horizons, the year following the death and over  
123 the lifetime. Estimations were performed in total numbers for the yearly cohorts as well as per person.  
124 Productivity loss was further estimated over five different age groups, 18-24, 25-34, 35-44, 45-54 and  
125 55-67, both over a one-year time horizon and over a lifetime. The parameters included in the estimations  
126 were the average employment rate in Sweden, the average monthly salary, social fees (31.42% of the  
127 monthly salary), vacation compensation (12% of the monthly salary) and the pension fee paid by  
128 employers (4.5% of the monthly salary); see Table 1. All calculations were performed on a yearly basis.  
129

130 Due to premature death and loss of productivity, individuals are unable to contribute to the tax system  
131 at large. Taxes in Sweden are divided into state-, regional- and local-level authorities. Most of these  
132 taxes are paid by individuals through salary compensation and value added tax (VAT) on goods and  
133 services purchased and by employers through social and pension fees. Tax loss (part of the total indirect  
134 cost) was estimated as the percentage of the monthly income that would have gone to taxes, with a  
135 regional tax of 11.49% of the monthly income and a local authority tax of 20.70% of the monthly salary.  
136

### 137 *Discounting, Economic Growth, and Inflation*

138 For the lifetime horizon, future costs were discounted at an annual rate of 3%, which is recommended  
139 for health economic evaluations in Sweden (15). This discount rate accounts for the time preference of  
140 money, reflecting the principle that costs incurred in the future are less valuable than costs incurred  
141 today. Additionally, future economic growth rates and inflation were considered by adjusting the  
142 average salary growth rate based on historical data from Statistics Sweden. The average annual growth  
143 rate of salaries was assumed to be 2%, and the inflation rate was assumed to be 1.5%, based on historical  
144 trends.

145

#### 146 *Net vs. Gross Salary*

147 The salary data used in this study represent gross salaries, which include all taxes and social fees. The  
148 salaries were adjusted for age-specific variations. This approach provides a comprehensive estimate of  
149 the economic impact of suicide by capturing the total earnings lost, including the portions that would  
150 have been paid as taxes and social contributions.

151

#### 152 *Sensitivity analysis*

153 In the sensitivity analysis, the employment rate was varied to 40 percent, 50 percent, 60 percent, 70  
154 percent, and 80 percent to account for the possible difference in productivity for this specific cohort.

155

156

## 157 **Results**

158 Between 2010 and 2019, 1 406 to 1 591 suicides occurred every year in Sweden. The average age of  
159 people who commit suicide during these years was approximately 50 years. In total, approximately  
160 26 500 productive life years were lost every year due to suicide (supplementary table 2).

161

#### 162 *Total cost*

163 Between 2010 and 2019, the total cost of suicide related to indirect costs varied between 32 million and  
164 44 million euros over a one-year horizon and between 795 million and 935 million euros over a lifetime

165 horizon. The indirect costs per person varied between 28 thousand and 37 thousand euros over a one-  
166 year horizon and between 708 thousand and 778 thousand euros over a lifetime horizon (Table 2).

167 *Table 2. Total forgone costs due to suicide over a one-year time horizon and a lifetime horizon*

| Year | Productivity losses |               | Productivity losses per person |           |
|------|---------------------|---------------|--------------------------------|-----------|
|      | 1 year              | Lifetime      | 1 year                         | Lifetime  |
| 2010 | 32 000 000 €        | 795 000 000 € | 28 000 €                       | 708 000 € |
| 2011 | 33 000 000 €        | 830 000 000 € | 30 000 €                       | 758 000 € |
| 2012 | 37 000 000 €        | 865 000 000 € | 31 000 €                       | 725 000 € |
| 2013 | 38 000 000 €        | 926 000 000 € | 31 000 €                       | 760 000 € |
| 2014 | 38 000 000 €        | 909 000 000 € | 32 000 €                       | 769 000 € |
| 2015 | 38 000 000 €        | 891 000 000 € | 32 000 €                       | 743 000 € |
| 2016 | 38 000 000 €        | 834 000 000 € | 34 000 €                       | 751 000 € |
| 2017 | 41 000 000 €        | 883 000 000 € | 35 000 €                       | 769 000 € |
| 2018 | 44 000 000 €        | 926 000 000 € | 37 000 €                       | 769 000 € |
| 2019 | 44 000 000 €        | 935 000 000 € | 37 000 €                       | 778 000 € |

168 *Exchange rate of Swedish krona to Euros on the 26<sup>th</sup> of November 2023. 1 SEK = 0,087 €*

169

170 *Age groups*

171 The productivity loss between different age groups was estimated (supplementary table 3) both in total  
172 and per person. Over a one-year period, the highest total and per-person costs were found for the 45- to  
173 54-year-old age group, followed by the 35- to 44-year-old age group. The cost per person for the 45- to  
174 54-year-old age group ranged between 54 thousand euros and 56 thousand euros. The lowest costs are  
175 found in the 18-24 age group; in this age group, the costs vary between 17 thousand euros and 19  
176 thousand euros per person.

177 Over a lifetime horizon (Table 3), the highest cost is found for the 18-24 age group per person. For this  
178 group, the costs vary by approximately 20 million SEK. The lowest costs are found in the 55- to 67-  
179 year-old age group, where the costs vary by approximately 3 million SEK.

180

181 *Table 3. Total cost per person for different age groups over a lifetime horizon*

| Age group | Productivity loss over a lifetime | Productivity loss per person over a lifetime |
|-----------|-----------------------------------|----------------------------------------------|
| 18-24     | 227 000 000 €                     | 1 600 000 €                                  |
| 25-34     | 411 000 000 €                     | 1 500 000 €                                  |
| 35-44     | 262 000 000 €                     | 1 200 000 €                                  |

|       |               |           |
|-------|---------------|-----------|
| 45-54 | 192 000 000 € | 720 000 € |
| 55-67 | 72 000 000 €  | 280 000 € |

182

### 183 *Loss of taxes 2019*

184 As part of the indirect costs of suicide in 2019, the losses in taxes for different sectors amounted to  
185 approximately 6.4 million euros for the local authorities and 3.6 million euros for the regional  
186 authorities. The lost social fees that would have been transferred to the state for the cohort that passed  
187 away in 2019 amount to 14.5 million euros.

188

### 189 *Sensitivity analysis*

190 In the sensitivity analysis, the employment rate varied between 40 and 80%. The average employment  
191 rate in Sweden is approximately 67 percent. In 2019, the indirect costs over a one-year period varied  
192 between 20 thousand euros and 40 thousand euros per person. Over a lifetime, the costs varied between  
193 428 thousand and 856 thousand euros. In the different age groups, the indirect cost (per person) over a  
194 one-year period varied between 15 thousand – 31 thousand euros (age group 18-24), 18 thousand – 37  
195 thousand euros (age group 25-34), 22 thousand – 44 thousand euros (age group 35-44), 23 thousand –  
196 46 thousand euros (age group 45-54) and 22 thousand – 45 thousand euros (age group 55-67). Over a  
197 lifetime horizon, the indirect costs due to suicide (per person) varied between 734 thousand – 1.5 million  
198 euros (age group 18-24), 655 thousand – 1.3 million euros (age group 25-34), 507 thousand – 1 million  
199 euros (age group 35-44), 323 thousand – 647 thousand euros (age group 45-54) and 131 thousand – 262  
200 thousand euros (age group 55-67).

201

## 202 **Discussion**

203 This study provides valuable insights into the economic burden of suicide on Swedish society. The  
204 findings reveal substantial financial implications, with suicide accounting for significant amounts in  
205 terms of both one-year and lifetime estimates. In 2019, the total productivity losses amounted to  
206 44 000 000 € yearly. Some of these losses fall on the state (14.5 million euros), regional (3.6 million  
207 euros) and local (6.4 million euros) authorities due to tax losses.



208

209 The costs per person, though varying across different studies, offer a comparative perspective. A study  
210 from Finland estimated substantially lower costs per person over a lifetime perspective than reported in  
211 this study (322,928 euros compared with 729,575 euros). The reasons for this are the different methods  
212 used in the estimation. We estimated indirect costs based on loss of production, whereas Solin and  
213 colleagues measured costs only in terms of lost tax returns in Finland [7]. In contrast, an Australian  
214 study which estimated indirect costs of suicide for individuals ages 24 and younger, found a similar  
215 yearly indirect cost, 1 700 000 euros, compared to our estimates of 1 600 000 euros for individuals aged  
216 24 and younger [15].

217

218 This study underlines the potential economic benefits of effective suicide prevention, aligning with  
219 previous research highlighting the substantial returns, both monetary and in terms of human well-being,  
220 that successful prevention strategies can yield. The economic foundation provided by this study can  
221 provide powerful support for knowledge-based decision-making as well as for the development and  
222 evaluation of preventive measures.

223

224 The focus on costs associated with loss of productivity excludes other substantial costs related to suicide,  
225 such as emergency response, medical care, family members' incapacity for work and/or potential  
226 treatment costs related to complicated grief and other disorders of relatives, costs related to the transport  
227 system (e.g., in railway, subway and motorway suicides) and property damage. Both Kinchin et al. and  
228 Solin et al. included costs related to direct medical or emergency expenditures (7, 16). However, the  
229 direct cost only accounted for a fraction of the total cost of suicide, and the other unrelated costs are also  
230 likely to be only a fraction of the total costs related to suicide. In the Kinchin et al. study, health-care  
231 costs during suicide-related emergencies only accounted for 0.01% of the total cost, and in the study by  
232 Solin et al., the productivity loss from deceased people accounted for approximately 70%. Similarly, a  
233 study by Segar et al. estimating the costs of suicides in France found that the direct costs of completed  
234 suicides are very small compared to indirect costs, with direct costs accounting for only 0.4%,  
235 highlighting the significant economic burden of productivity losses and other societal impacts (17).

236

237 In this study, we have chosen to focus exclusively on completed suicides for several reasons. Firstly,  
238 completed suicides are clearly defined and recorded in national databases, providing us with accurate  
239 and reliable data, which minimizes the risk of inaccuracies and uncertainties in our analyses. Secondly,  
240 completed suicides have a direct and measurable economic impact on society, including lost  
241 productivity and tax revenues. By focusing on these, we can clearly demonstrate the economic burden  
242 and the need for effective preventive measures. Thirdly, policymakers and decision-makers require  
243 concrete and specific data to make informed decisions about resource allocation and the development  
244 of preventive strategies. By focusing on completed suicides, we provide information needed to prioritize  
245 preventive interventions that may save lives. By limiting our scope to completed suicides, we can  
246 conduct a more focused and in-depth analysis. Lastly, previous studies in this field have also focused  
247 on completed suicides (7, 16). By doing the same, the results are comparable to previous research and  
248 contribute to a more coherent and comparable knowledge base.

249

250 This study has several strengths. First, it uses data from high-quality nationwide registries, which  
251 eliminates selection bias and ensures that all cases of suicide in Sweden are included in the dataset.  
252 Second, the complete dataset allows for a comprehensive analysis of the data, which is a major strength  
253 of the study. Third, the assumptions made in the study are conservative, which means that the results  
254 are probably an underestimation of the total cost burden.

255

256 The study also has some limitations. One limitation is the decision to only include individuals aged 18-  
257 67 years, based on presumed employment, which raises concerns about the exclusion of a significant  
258 portion of the population. The age for retirement in Sweden is 67, and it is common to assume that  
259 income and tax-generating productivity are subsequently reduced to zero. However, this group,  
260 particularly the 85+ group, has the highest suicide risk among all age groups, and most individuals who  
261 retire in Sweden continue to contribute to unpaid work. However, the consequence of using the human  
262 capital approach for estimating the costs of suicide is the exclusion of this group from the analysis.  
263 Another limitation is the precision of our estimates. The Swedish nation-wide registers used as data

264 inputs were on an aggregate level; hence, the employment and salary for each individual were not  
265 available, and average estimates had to be used. These limitations should be kept in mind when  
266 interpreting the findings of this study. Finally, we included both certain and uncertain suicides in the  
267 estimation of productivity losses. Some of the uncertain suicides may not have been suicides, which  
268 may have led to an overestimation of the total indirect costs of suicide.

269

## 270 **Conclusion**

271 This study sheds light on the economic burden of suicide in Sweden, emphasizing the need for  
272 comprehensive preventive strategies. to the study provides a nuanced understanding of the economic  
273 implications of completed suicides, laying the groundwork for future research and policy discussions in  
274 the realm of suicide prevention.

275

276

277 Ethics approval and consent to participate

278 Not applicable

279

280 Consent for publication

281 Not applicable

282

283 Availability of data and materials

284 The data are available from the authors upon reasonable request and with the permission of National  
285 Centre for Suicide Research and Prevention (NASP).

286

287 Competing interests

288 The authors declare that they have no competing interests

289

290 Funding

291 FG salary.

292

293 Authors' contributions

294 DW, CN, FG, and GH Performed the analyses, collected the data, conceived and designed the analysis  
295 and wrote the paper.

296

297 Acknowledgements

298 This research was partly funded by grants from the Swedish research council for health working life and  
299 welfare (2022-00922).

300

301

302

## 303 References

304

- 305 1. Organization TWH. Suicide 2024 [updated 20230828; cited 2024 30 January ].  
306 Available from: <https://www.who.int/news-room/fact-sheets/detail/suicide>.
- 307 2. Ill-Health NCfSRaPoM. Interpreting suicide data 2023 [updated 06212023; cited  
308 2024 January 30]. Available from: <https://ki.se/en/nasp/interpreting-suicide-data>.
- 309 3. Dattani S, Rodés-Guirao L, Ritchie H, Roser M, Ortiz-Ospina E. Suicides2023.  
310 Available from: <https://ourworldindata.org/suicide>.
- 311 4. Too LS, Spittal MJ, Bugeja L, Reifels L, Butterworth P, Pirkis J. The association  
312 between mental disorders and suicide: A systematic review and meta-analysis of record linkage  
313 studies. *J Affect Disord*. 2019;259:302-13.
- 314 5. Matilla Santander N, Blazevska B, Carli V, Hadlaczky G, Linnarsjö A, Bodin T,  
315 et al. Relation between occupation, gender dominance in the occupation and workplace and  
316 suicide in Sweden: a longitudinal study. *BMJ Open*. 2022;12(6):e060096.
- 317 6. Shepard DS, Gurewich D, Lwin AK, Reed GA, Jr., Silverman MM. Suicide and  
318 Suicidal Attempts in the United States: Costs and Policy Implications. *Suicide Life Threat*  
319 *Behav*. 2016;46(3):352-62.
- 320 7. Solin P, Tamminen N, Seppänen A, Partonen T. Calculation of Costs Related to  
321 Death by Suicide in Finland. *Social Sciences*. 2022;11(10):468.
- 322 8. Swedish National Mediation Office. Löneskillnaden mellan kvinnor och män  
323 2019 : vad säger den officiella lönestatistiken? Stockholm: Medlingsinstitutet; 2020.
- 324 9. SCB. Arbetskraftsundersökningarna (AKU) 2019 [Elektronisk resurs].  
325 Stockholm: Statistiska centralbyrån; 2020.
- 326 10. Skatteverket. Arbetsgivaravgifter 2019 [Available from:  
327 <https://www.skatteverket.se/foretag/arbetsgivare/arbetsgivaravgifterochskatteavdrag/arbetsgivaravgifter.4.233f91f71260075abe8800020817.html>].
- 328 11. Swedish Tax Agency. Anställd inom kommun och region: Swedish Tax Agency,;  
329 2023 [Available from: <https://www.pensionsmyndigheten.se/forsta-din-pension/tjanstepension/anstalld-inom-kommun-och-region>].
- 330 12. Labour Mo. The Swedish annual leave act. Stockholm: Ministry of Labour; 1985.
- 331 13. Statistics Sweden. The total municipal tax rate increases next year: Statistics  
332 Sweden, ; 2023 [Available from: <https://www.scb.se/en/finding-statistics/statistics-by-subject-area/public-finances/local-government-finances/local-taxes/pong/statistical-news/municipal-taxes-2024/>].
- 333 14. European central bank (ECB). Euro foreign exchange reference rates: ECB; 2024  
334 [Available from: [https://www.ecb.europa.eu/stats/policy\\_and\\_exchange\\_rates/euro\\_reference\\_exchange\\_rates/html/eurofxref-graph-sek.en.html](https://www.ecb.europa.eu/stats/policy_and_exchange_rates/euro_reference_exchange_rates/html/eurofxref-graph-sek.en.html)].
- 335 15. (TLV) T-ol. Allmänna råd om ekonomiska utvärderingar (TLVAR 2017:1). 2017.
- 336 16. Kinchin I, Doran CM. The Cost of Youth Suicide in Australia. *Int J Environ Res*  
337 *Public Health*. 2018;15(4).
- 338 17. Segar LB, Laidi C, Godin O, Courtet P, Vaiva G, Leboyer M, et al. The cost of  
339 illness and burden of suicide and suicide attempts in France. *BMC Psychiatry*. 2024;24(1):215.

340

341

342

343

344

345

346

347

348
